# Supplementary material for: Assessment of the effect of ethanol extracts from Cinnamomum camphora seed kernel on intestinal inflammation using simulated gastrointestinal digestion and a Caco-2/RAW264.7 co-culture system
Source: Royal Society of Chemistry journal article supplement (doi:10.1039/d1fo01293b), 2021-01-01
Supplement: d1fo01293b1.pdf [file d1fo01293b1.pdf]

### Supplementary information

**Table S1.** Sequences of the primers used for qPCR.

**Table S2.** Total phenolic and total flavonoid content of dEE.

**Table S3.** Correlation coefficients between the parameters.

**Fig. S1.** Schematic illustration of Caco-2/RAW264.7 co-culture system. dEE was administered to Caco-2 cells grown for 21 days in transwell inserts, while LPS was administered to RAW264.7 cells to induce an inflammatory response.

**Fig. S2.** Total ion chromatograms (TIC) of dEE (A) negative ionization mode and (B) positive ionization mode, and (C) the chemical structures of tentatively identified compounds.

**Fig. S3.** Cytotoxic effect of dEE on RAW264.7 and Caco-2 cells measured by MTT ( $*p < 0.05$ ).

**Fig. S4.** Effect of dEE on the morphology changes of RAW264.7 cells in the LPS-induced Caco-2/RAW264.7 co-culture system. The cellular morphology was observed under 40× magnification using an EVOS FL microscope (AMG, Bothell, WA). Red arrow points to cell differentiation, white arrow points to cell disruption, and black arrow points to cellular oedema.

**Fig. S5.** Effect of dEE on the secretion of LDH in the LPS-induced Caco-2/RAW264.7 co-culture system.

**Table S1.** Sequences of the primers used for qPCR.

| Gene           | Sequence (5' to 3')              |
|----------------|----------------------------------|
| IL-1 $\beta$   | Forward: AGCACCTCACAAGCAGAGC     |
|                | Reverse: AAGGCATTAGAAACAGTCCAG   |
| IL-6           | Forward: CCCACCAAGAACGATAGTCAA   |
|                | Reverse: CAGTCCCAAGAAGGCAAC      |
| TNF- $\alpha$  | Forward: CACCACCATCAAGGACTCAA    |
|                | Reverse: TCAGGGAAGAATCTGGAAAG    |
| COX-2          | Forward: CCCATTAGCAGCCAGTT       |
|                | Reverse: GGAAGAGCATCGCAGAGG      |
| iNOS           | Forward: CACGGACGAGACGGATAG      |
|                | Reverse: CCACTGACACTTCGCACA      |
| ZO-1           | Forward: GAAAGGCGGATGGTGCT       |
|                | Reverse: TACTGTCCGTGCTATACATTGAG |
| Claudin-1      | Forward: CGATGCTTTCTGTGGCTAA     |
|                | Reverse: CAGTGGCTGACTTTCCTTGT    |
| Occludin       | Forward: TTCTGTTGGCGTTGGC        |
|                | Reverse: AGGGATGTCGGAAATCTAAT    |
| $\beta$ -actin | Forward: CTGTCCCTGTATGCCTCTG     |
|                | Reverse: TGTCACGCACGATTTCC       |

**Table S2.** Total phenolic and total flavonoid content of dEE.

|     | Total phenolic (mg GAE/g dw) | Total flavonoid (mg RE/g dw) |
|-----|------------------------------|------------------------------|
| dEE | 113.42±3.69                  | 155.08±5.41                  |

GAE: gallic acid equivalent; RE: rutin equivalent.

dEE: digested ethanol extracts; dw: dry weight.

**Table S3.** Correlation coefficients between the parameters<sup>a</sup>.

|     | ROS      | Cell<br>viability | NO       | PGE <sub>2</sub> | TNF- $\alpha$ | IL-1 $\beta$ | IL-6     | iNOS     | COX-2    | TNF- $\alpha$<br>mRNA | IL-1 $\beta$<br>mRNA | IL-6<br>mRNA |
|-----|----------|-------------------|----------|------------------|---------------|--------------|----------|----------|----------|-----------------------|----------------------|--------------|
| TP  | -0.857** | 0.882**           | -0.970** | -0.970**         | -0.948**      | -0.950**     | -0.968** | -0.909** | -0.950** | -0.988**              | -0.919**             | -0.981**     |
| ROS | 1        | -0.578*           | 0.873**  | 0.834**          | 0.778**       | 0.851**      | 0.779**  | 0.750**  | 0.889**  | 0.854**               | 0.912**              | 0.856**      |

  

|     | ZO-1<br>mRNA | Claudin-<br>1 mRNA | Occludin<br>mRNA | TLR4    | p-P65<br>/P65 | p-I $\kappa$ B $\alpha$<br>/I $\kappa$ B $\alpha$ | p-P38<br>/P38 | p-JNK<br>/JNK | p-ERK<br>/ERK | ZO-1   | Claudin-<br>1 | Occludin |
|-----|--------------|--------------------|------------------|---------|---------------|---------------------------------------------------|---------------|---------------|---------------|--------|---------------|----------|
| TP  | 0.942**      | 0.893**            | 0.947**          | -0.691* | -0.497        | -0.332                                            | -0.733**      | -0.305        | -0.642*       | 0.550  | 0.338         | 0.358    |
| ROS | -0.679*      | -0.784**           | -0.683**         | 0.792** | 0.488         | 0.054                                             | 0.811**       | 0.460         | 0.379         | -0.205 | -0.570        | -0.004   |

<sup>a</sup> Data represents Pearson Correlation Coefficient R. TP: total phenolics content; \*p < 0.05, \*\*p < 0.01.

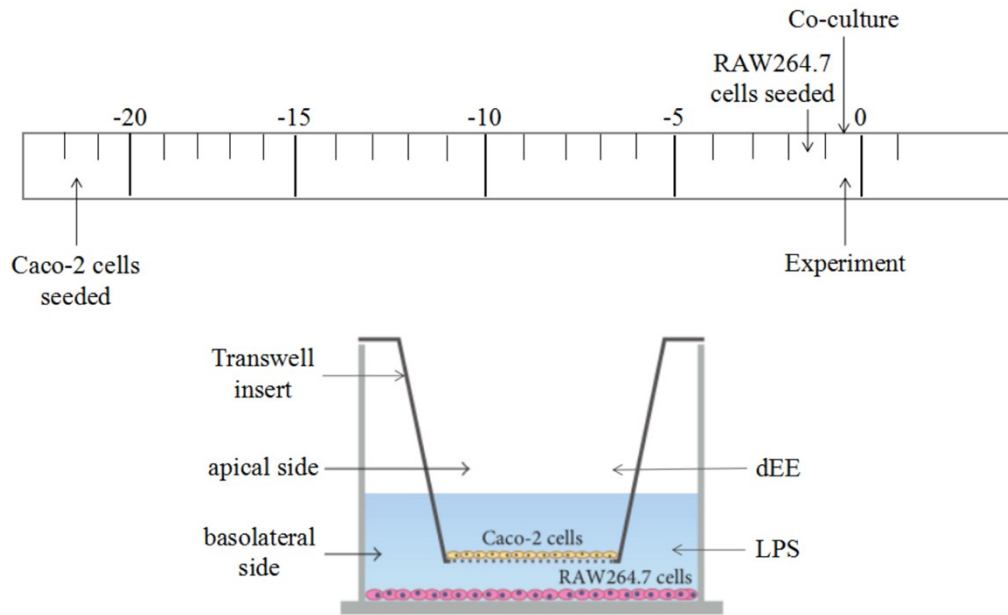

**Fig. S1.** Schematic illustration of Caco-2/RAW264.7 co-culture system. dEE was administered to Caco-2 cells grown for 21 days in transwell inserts, while LPS was administered to RAW264.7 cells to induce an inflammatory response.

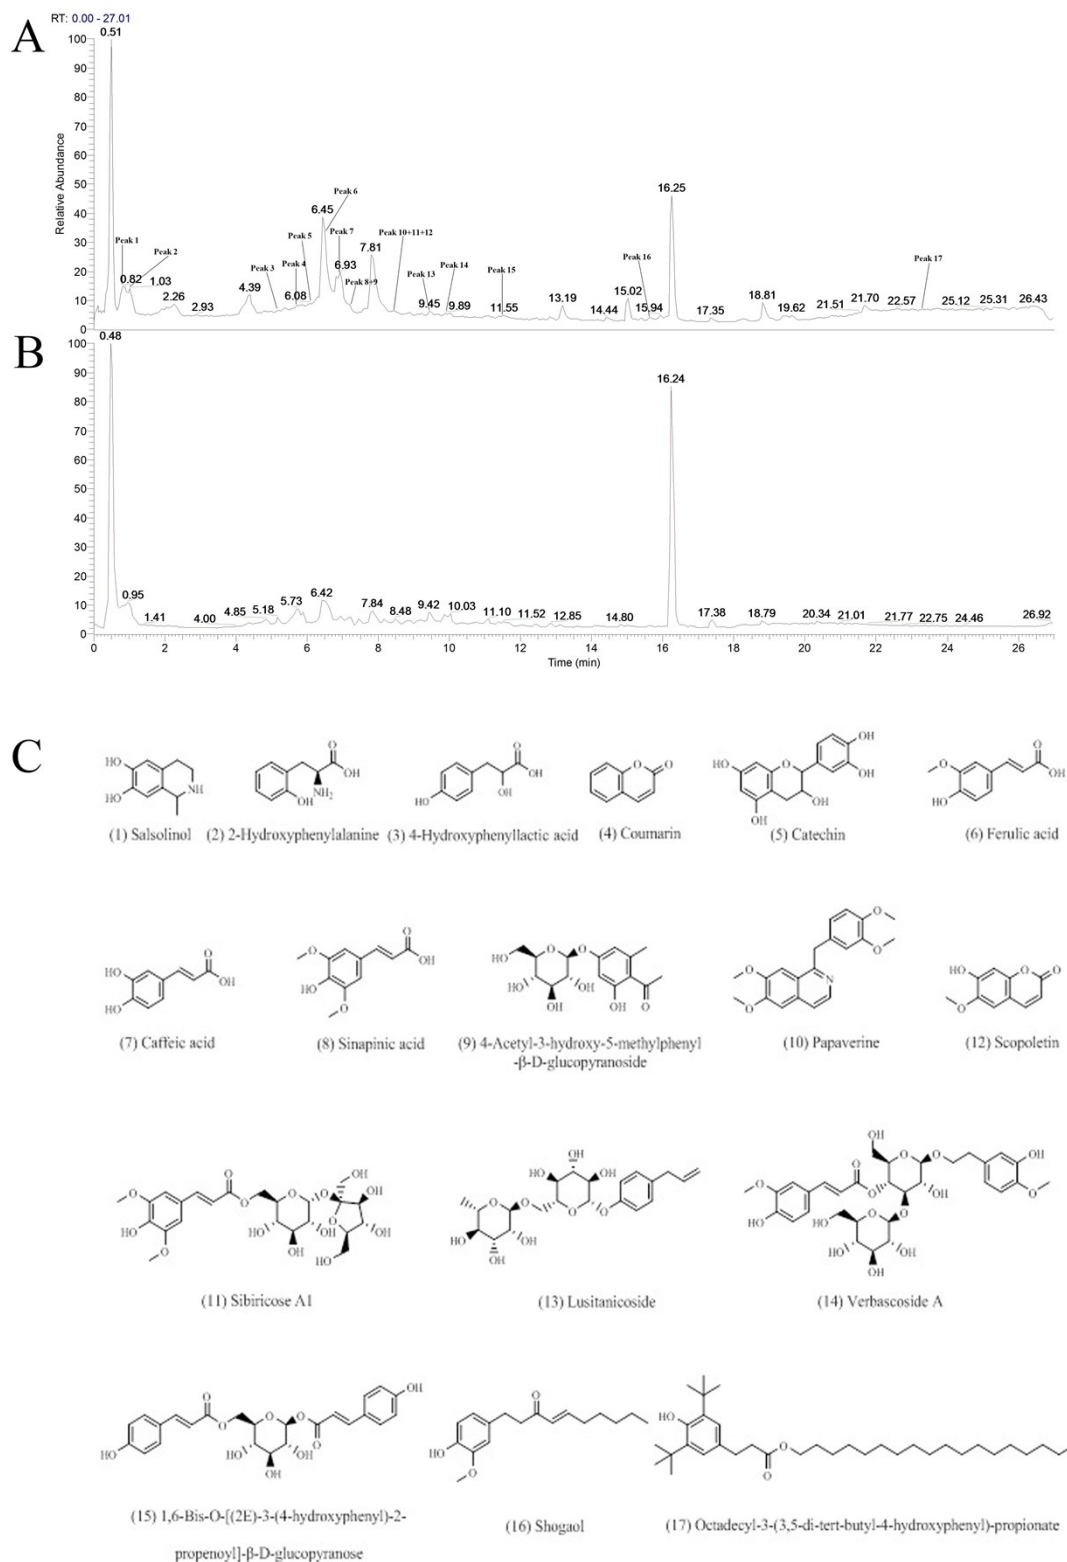

**Fig. S2.** Total ion chromatograms (TIC) of dEE (A) negative ionization mode and (B) positive ionization mode, and (C) the chemical structures of tentatively identified compounds.

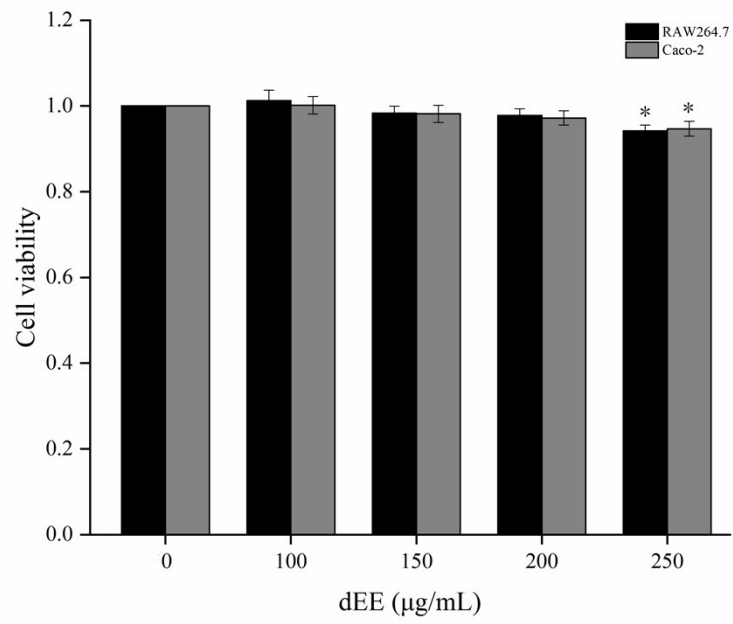

**Fig. S3.** Cytotoxic effect of dEE on RAW264.7 and Caco-2 cells measured by MTT

(\* $p < 0.05$ ).

(1) Control

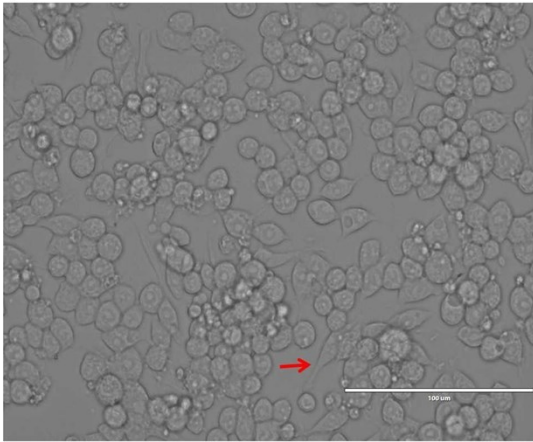

(2) LPS

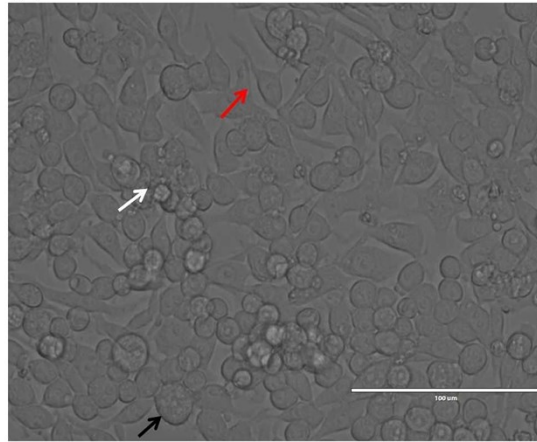

(3) LPS + dEE (100 µg/mL)

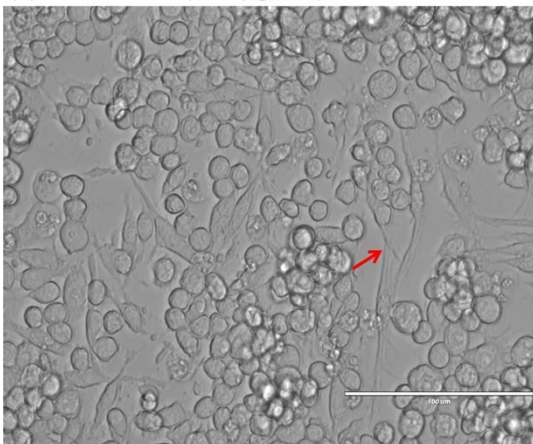

(4) LPS + dEE (150 µg/mL)

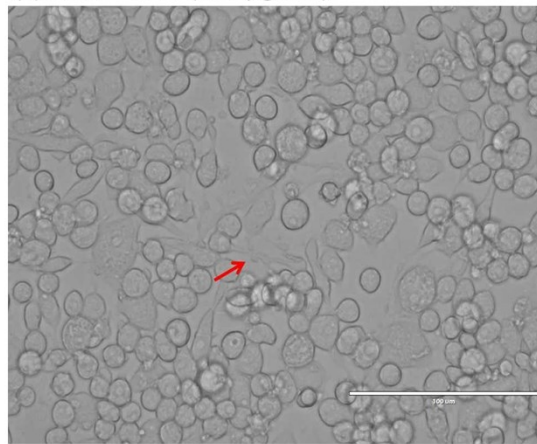

(5) LPS + dEE (200 µg/mL)

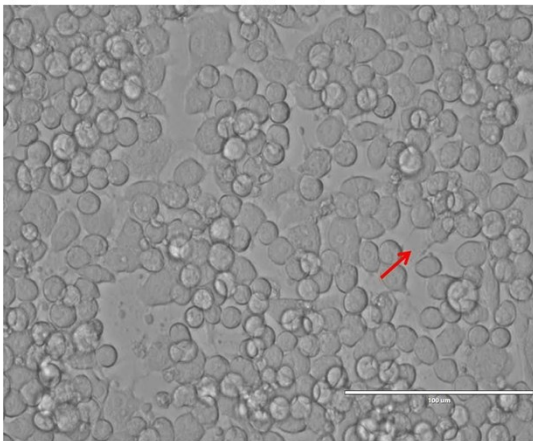

**Fig. S4.** Effect of dEE on the morphology changes of RAW264.7 cells in the LPS-induced Caco-2/RAW264.7 co-culture system. The cellular morphology was observed under 40× magnification using an EVOS FL microscope (AMG, Bothell, WA). Red arrow points to cell differentiation, white arrow points to cell disruption, and black arrow points to cellular oedema.



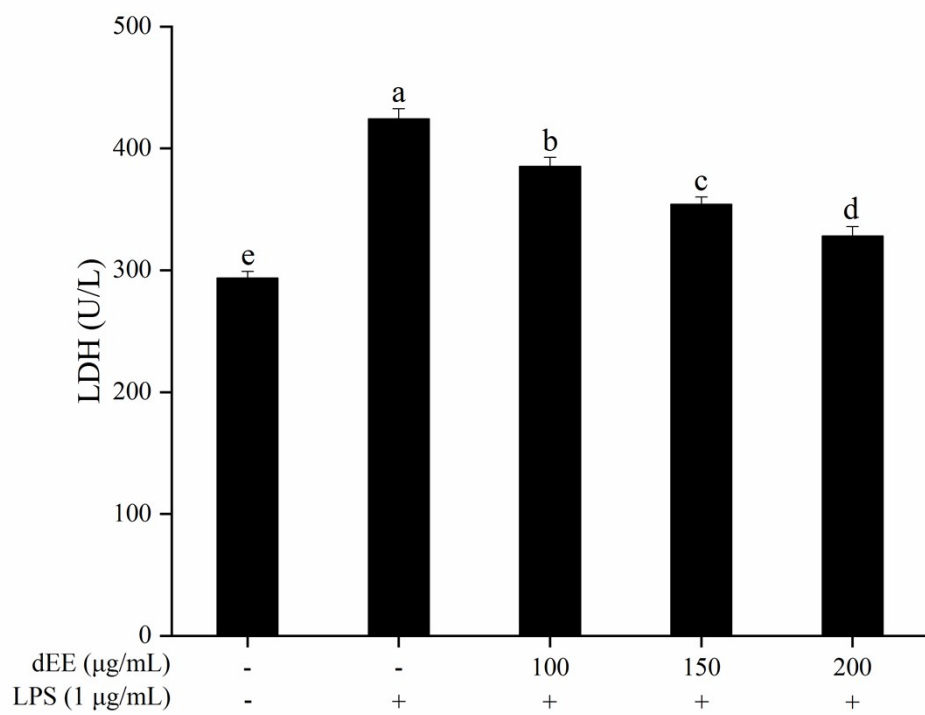

**Fig. S5.** Effect of dEE on the secretion of LDH in the LPS-induced Caco-2/RAW264.7 co-culture system.
